# Supplementary material for: Synthesis of Quantum Dot-ZnS Nanosheet Inorganic Assembly with Low Thermal Fluorescent Quenching for LED Application
Source: MDPI journal article supplement (doi:10.3390/ma10111242), 2017-10-27
Supplement: s1 [file s1]

# Supplementary Materials: Synthesis of Quantum Dot-ZnS Nanosheet Inorganic Assembly with Low Thermal Fluorescent Quenching for LED Application

Yangyang Xie, Chong Geng, Yiqun Gao, Jay Guoxu Liu, Zi-Hui Zhang, Yonghui Zhang, Shu Xu and Wengang Bi

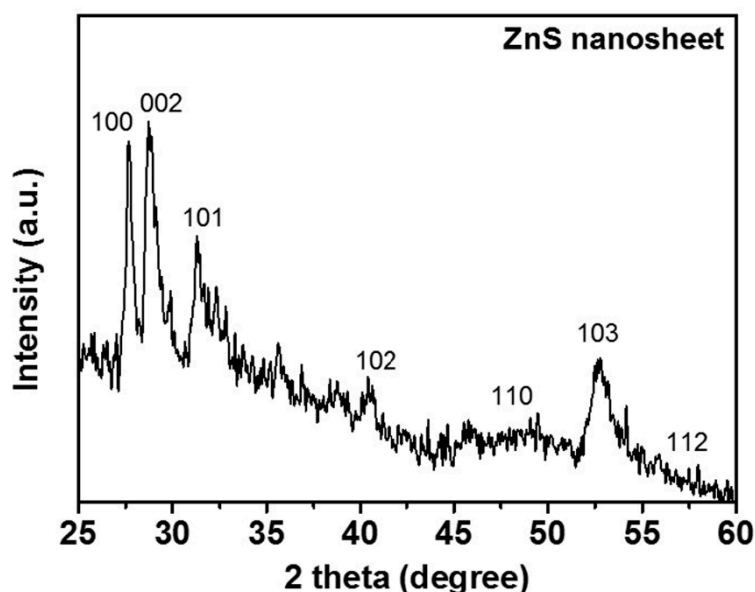

Figure S1. The XRD characterization of the ZnS nanosheet.

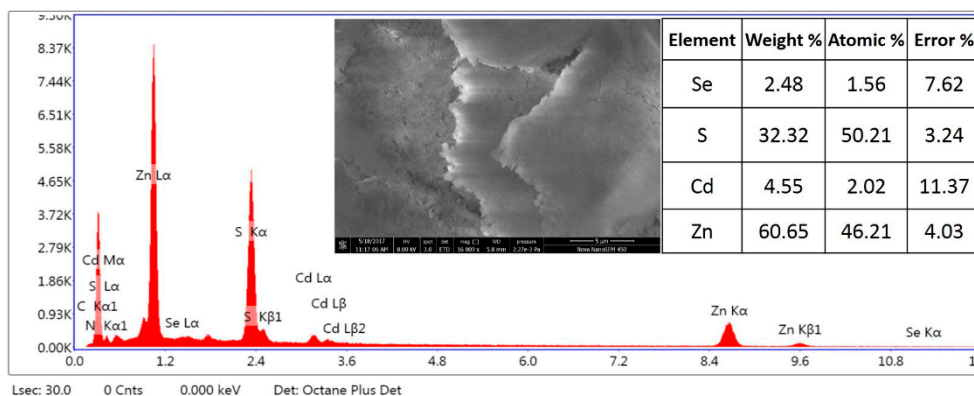

Figure S2. The EDX measurement of the QD-ZnS NIAM (inserted images show the SEM pattern of the QDs-ZnS NIAM sample and the test data).

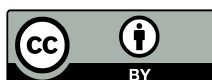

© 2017 by the authors. Submitted for possible open access publication under the terms and conditions of the Creative Commons Attribution (CC BY) license (<http://creativecommons.org/licenses/by/4.0/>).
